# Supplementary material
Source: PubMed Central journal article supplement (PMC4090272)
Supplement: NIHMS587128-supplement-1.pdf [file NIHMS587128-supplement-1.pdf]

## Supplementary Table 1: Gene Alterations in AML Cell Lines used in This Study

| Cell Line | Type                  | Gene Alterations                          |
|-----------|-----------------------|-------------------------------------------|
| OCI/AML3  | Myeloid Leukemia      | N-Ras(Q61), NPM mutation, TP53-wt         |
| MOLM13    | AML                   | FLT3/ITD, NPM1-wt, TP53-wt                |
| U937      | Myeloid Leukemia      | TP53 mutation, PTEN mutations             |
| KG-1      | AML                   | Ras-wt, FLT3-wt, p53 truncation, PTEN (+) |
| MV4-11    | Biphenotypic Leukemia | FLT3/ITD, NPM1-wt, TP53-wt                |

Supplementary table S2: Gene alterations and cytogenetic information on 10 peripheral blood or bone marrow samples obtained from AML patients

| Case no. | Sample type | Blasts (%) | Disease status      | RAS                | FLT3 | NPM1 | CEBPA | cytogenetic information                                                                                                                         |
|----------|-------------|------------|---------------------|--------------------|------|------|-------|-------------------------------------------------------------------------------------------------------------------------------------------------|
| 1        | PB          | 65         | newly diagnosed     | NRAS (G12S & G12C) | -    | -    | -     | Diploid                                                                                                                                         |
| 2        | PB          | 96         | refractory          | NRAS (Q61R)        | -    | -    | -     | 46,XY,t(11;17)(q23;q25)[13]; 46,idem,del(20)(q11.2q13.1)[2]; 46,XY,der(11)t(11;17)(q23;q25),der(12)t(11;12)(q23;p13),der(17)t(11;17)t(11;12)[5] |
| 3        | PB          | 87         | refractory          | NRAS (G12D)        | -    | -    | -     | 46,XY,add(3)(q27)[16]                                                                                                                           |
| 4        | PB          | 76         | relapsed/refractory | NRAS (G12D)        | -    | -    | -     | 46,XY,del(6)(q13q27)[7]; 46,XY[13]                                                                                                              |
| 5        | PB          | 95         | refractory          | NRAS (G12D)        | -    | -    | -     | 46,XY,del(3)(q12q25)[1]                                                                                                                         |
| 6        | BM          | 62         | newly diagnosed     | NRAS (Q61K)        | -    | +    | -     | 46,XY,t(8;21)(q22;q22)[20]                                                                                                                      |
| 7        | PB          | 89         | refractory          | NRAS (G13R)        | -    | -    | -     | 46,XY,inv(3)(q21q26.2)[1]                                                                                                                       |
| 8        | BM          | 96         | refractory          | -                  | -    | -    | +     | 46,XY,del(6)(q24).ish del(6)(MYB+)[1]                                                                                                           |
| 9        | PB          | 67         | relapsed/refractory | -                  | -    | -    | -     | Diploid                                                                                                                                         |
| 10       | PB          | 75         | relapsed            | -                  | -    | +    | -     | 46,XY,del(9)(q13q22)[18]; 46,XY[2]                                                                                                              |
| 11       | BM          | 84         | newly diagnosed     | -                  | ITD  | +    | -     | Diploid                                                                                                                                         |
| 12       | PB          | 48         | relapsed/refractory | -                  | ITD  | -    | -     | Diploid                                                                                                                                         |
| 13       | BM          | 80         | newly diagnosed     | -                  | D835 | +    | -     | 47,XX,+mar[1]; 46,XX[1]                                                                                                                         |
| 14       | BM          | 90         | newly diagnosed     | -                  | D835 | -    | -     | 45,XX,1p-,3,5q+,-7,+mar[9]                                                                                                                      |

Abbreviations: NPM1, Nucleophosmin 1; CEBPA, CCAAT/enhancer-binding protein alpha; PB, peripheral blood; BM, bone marrow.

## Supplementary Figures:

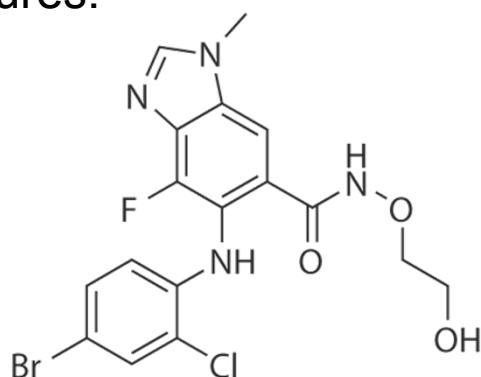

**Selumetinib (AZD6244) Chemical Structure.**  
**Molecular Weight: 457.68**

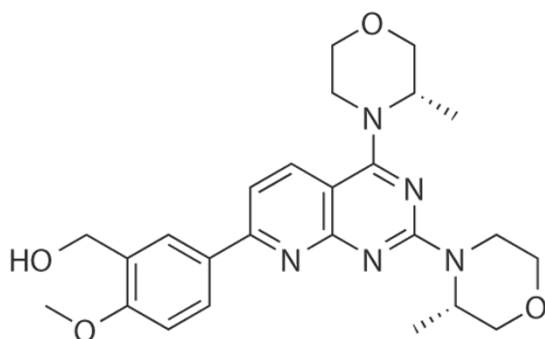

**AZD8055 Chemical Structure**  
**Molecular Weight: 465.54**

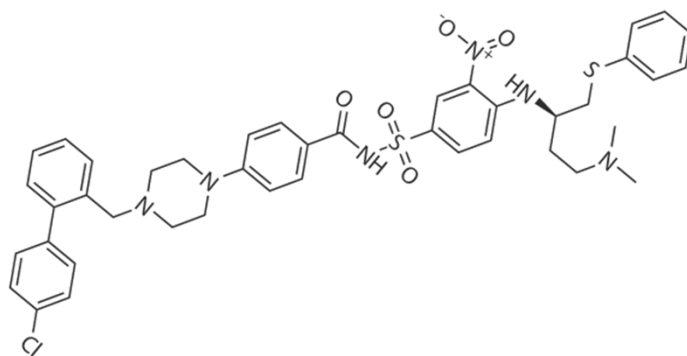

**ABT737 Chemical Structure**  
**Molecular Weight: 813.43**

Fig. S1. Molecular structures of drugs used in this study.

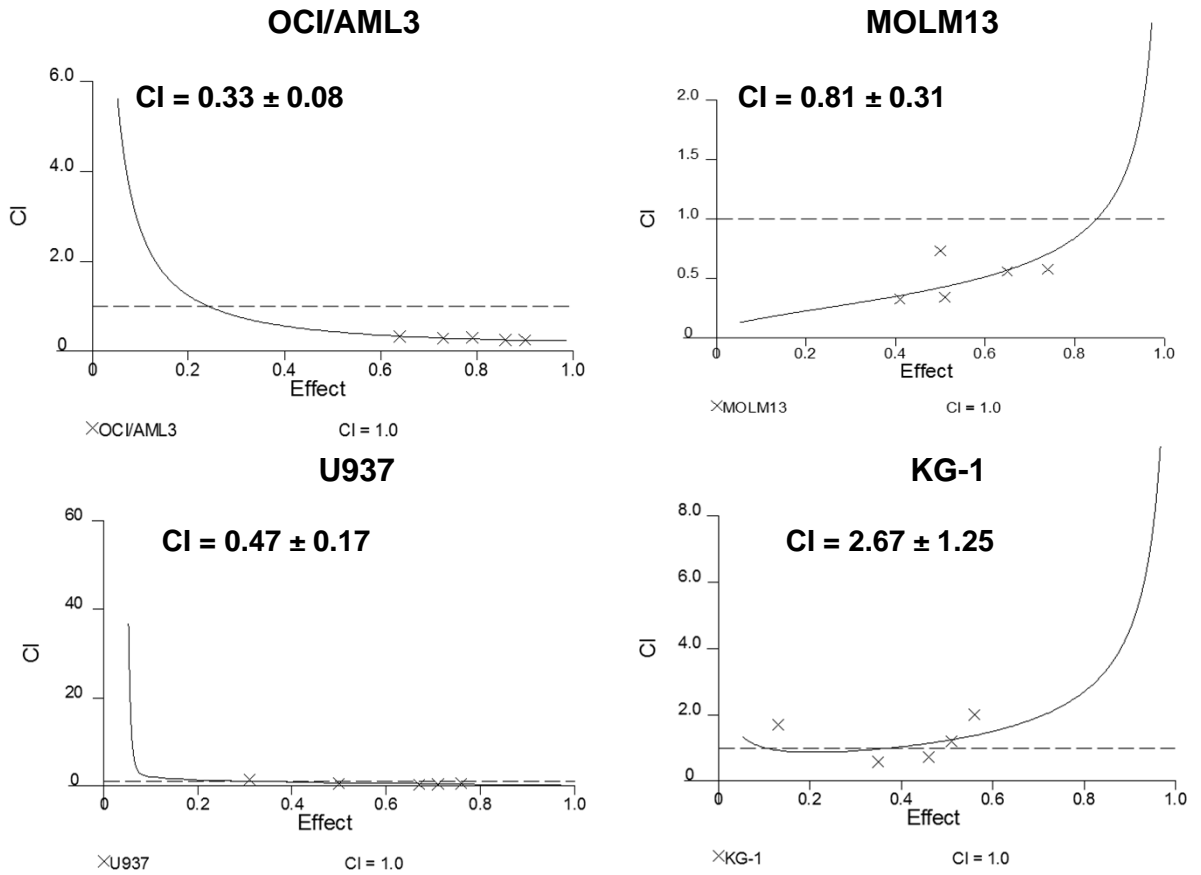

Fig. S2. The Chou-Talalay method [Chou et al. Cancer Res. 2010; 70: 440-446] was used to determine combination indices (CIs) in AML cell lines treated with combination of AZD8055 and selumetinib for 48 hours.

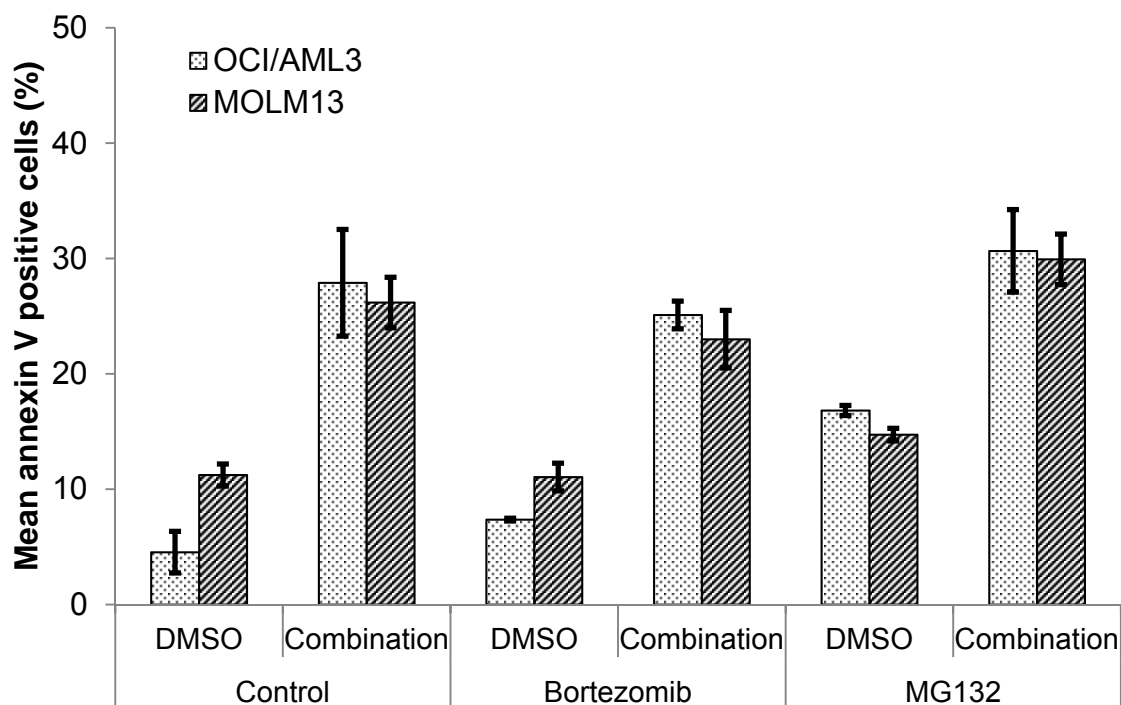

Fig. S3. OCI/AML3 cells were pretreated with proteasome inhibitors bortezomib (0.01  $\mu\text{mol/L}$ ) or MG132 (0.5  $\mu\text{mol/L}$ ) for 2 hours following by combination of AZD8055 (0.4  $\mu\text{mol/L}$ ) and selumetinib (0.2  $\mu\text{mol/L}$ ) for additional 48 hours. The apoptosis induction was measured using flow cytometry.

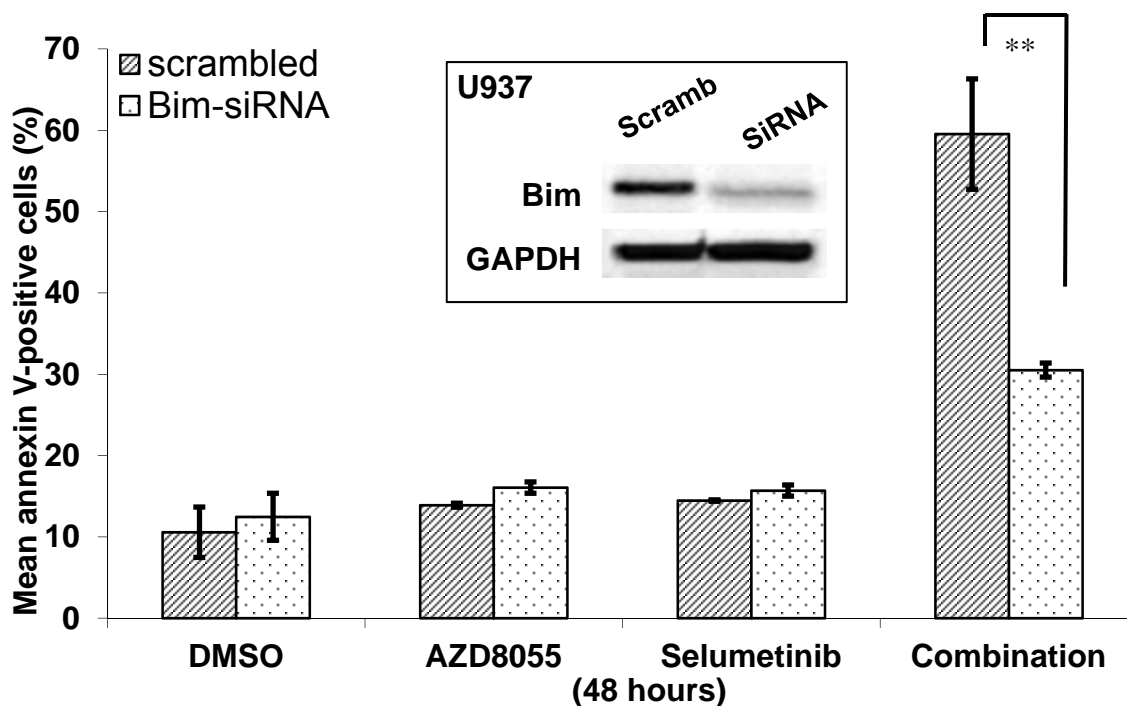

Fig. S4. U937 cells were electroporated with Bim siRNA or scrambled siRNA for 24 hours, treated with AZD8055 (0.4  $\mu\text{mol/L}$ ) and/or selumetinib (0.2  $\mu\text{mol/L}$ ) for 48 hours, and examined for apoptosis induction. Inset: knockdown of basal level of Bim protein expression.

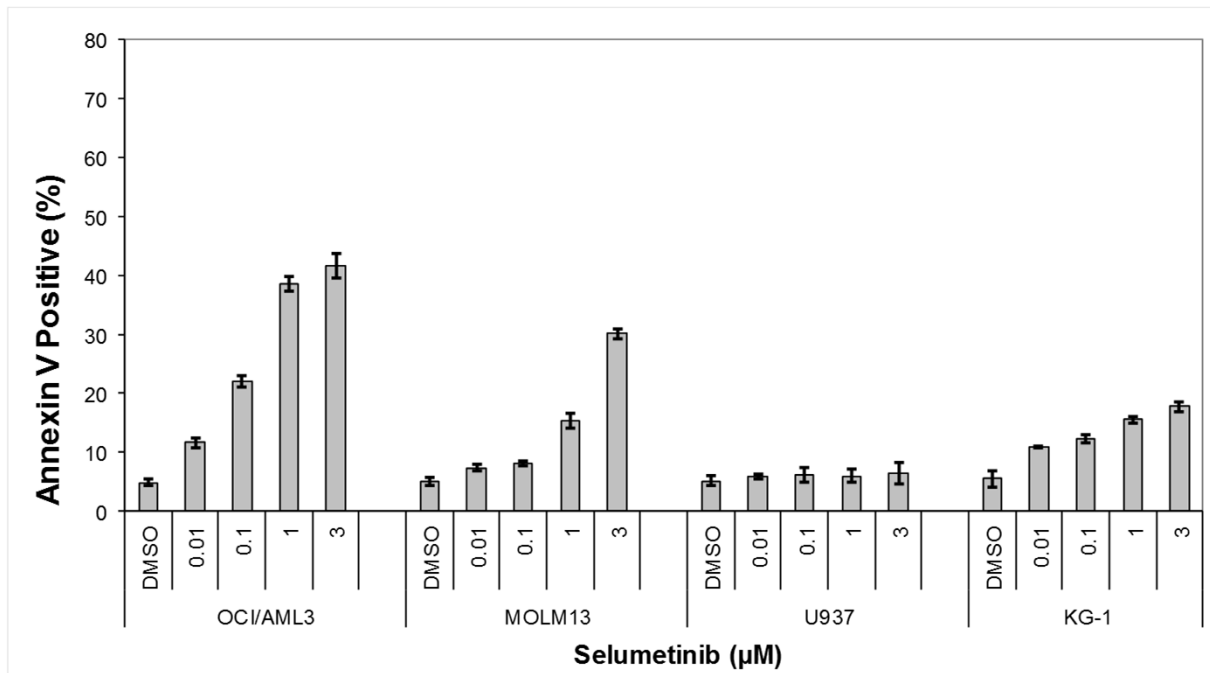

Fig. S5. AML cells were treated with indicated doses of selumetinib for 48 hours and apoptosis induction was determined using flow cytometry by measuring percentage of Annexin V positivity.

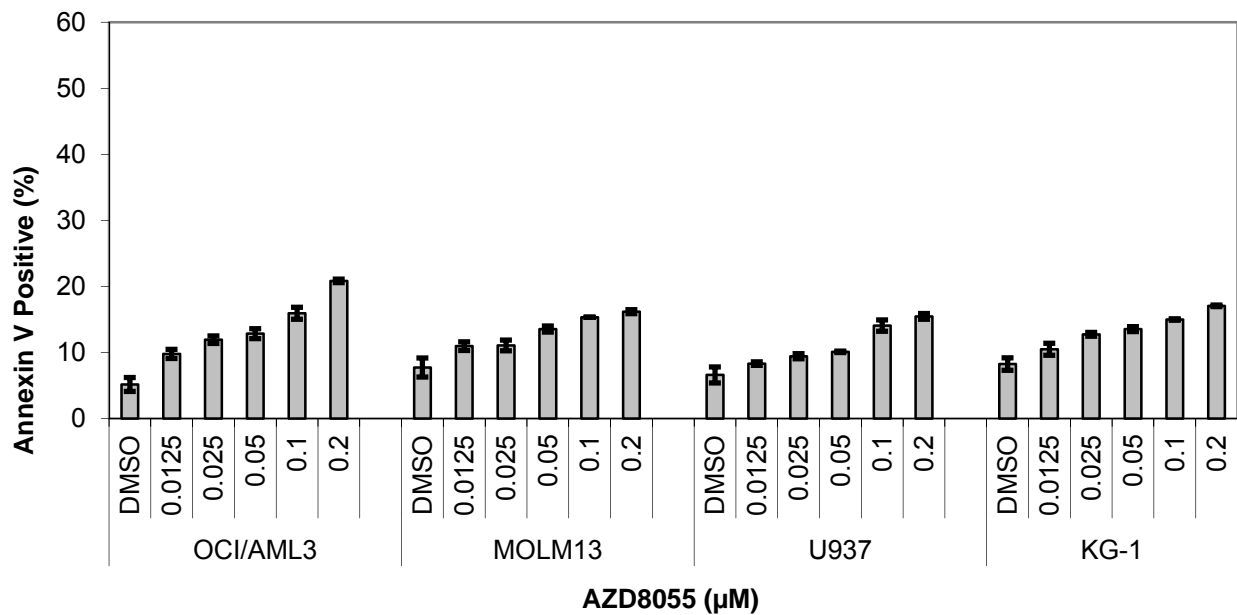

Fig. S6. AML cells were treated with indicated doses of AZD8055 for 48 hours and apoptosis induction was determined using flow cytometry by measuring percentage of Annexin V positivity.

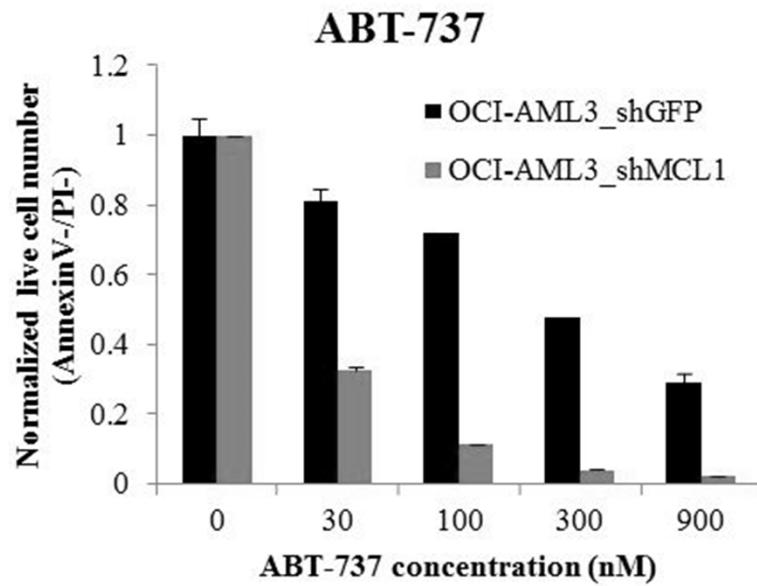

Fig. S7. OCI/AMI3\_shGFP and OCI/AMI3\_shMcl-1 AML cells were treated with indicated doses of ABT-737 for 48 hours and apoptosis induction was determined using flow cytometry by measuring Annexin V<sup>-</sup>/PI<sup>-</sup> population.
